# Supplementary material
Source: publisher site journal article supplement (https://www.dovepress.com/article/263740)
Supplement: Supplementary file 1 [file get_supplementary_file.php]

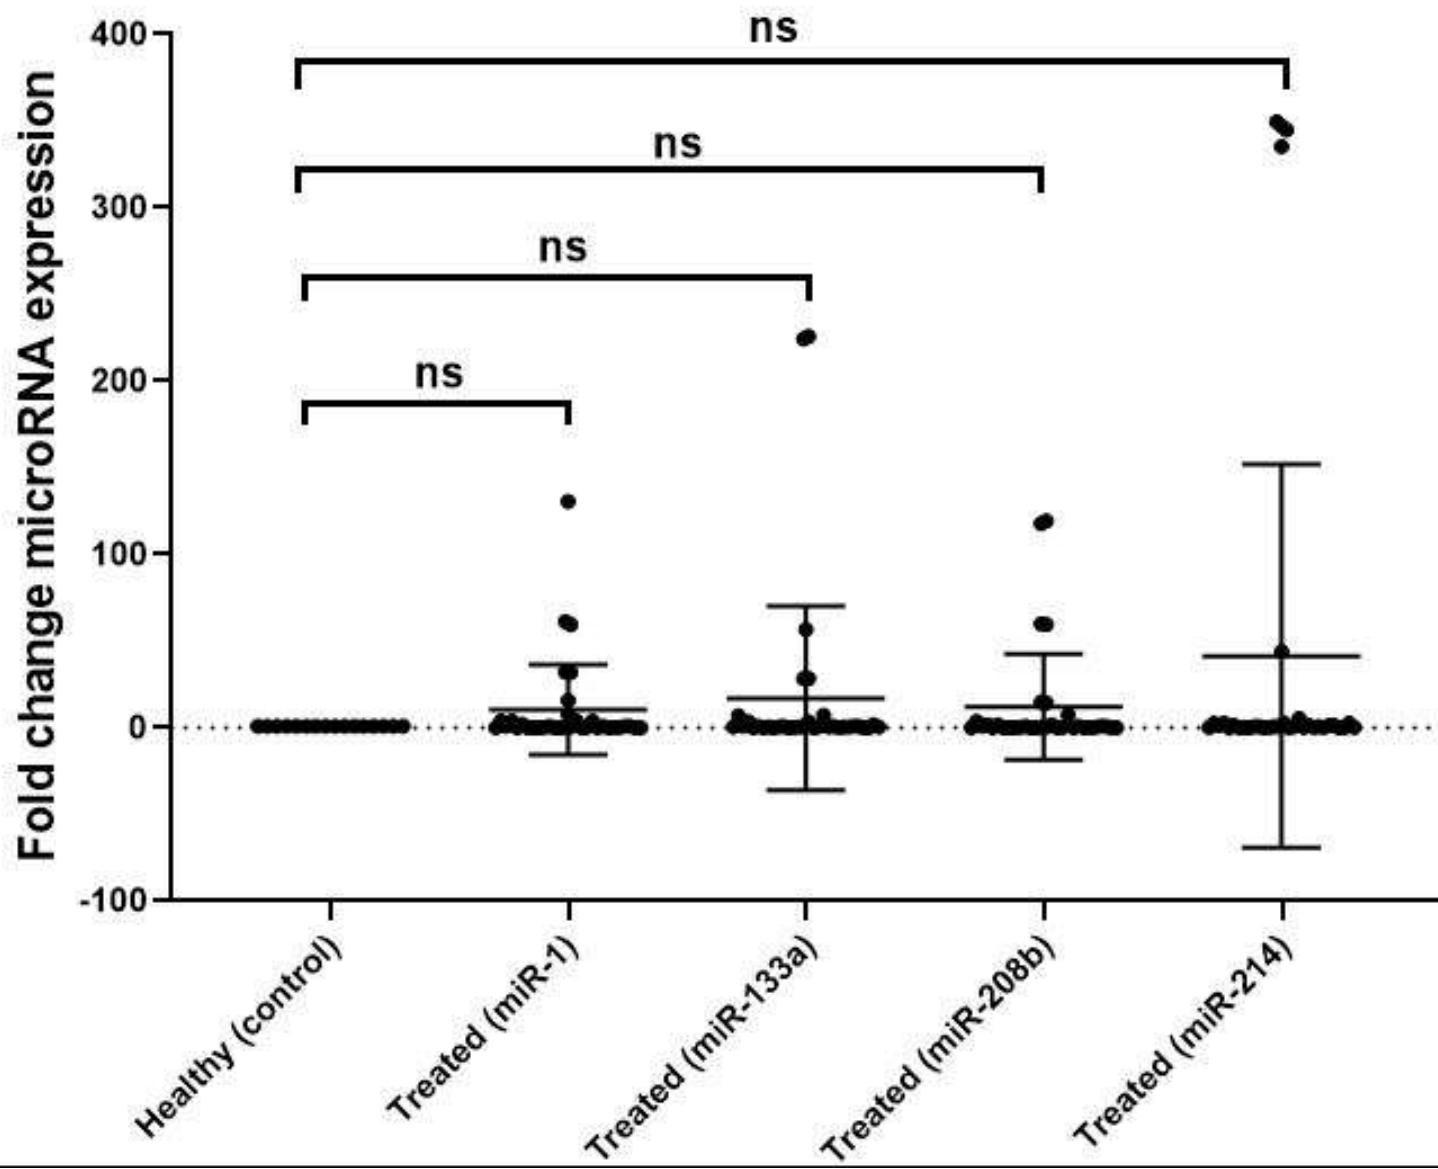

**Supplementary Figure 1. MicroRNA expression in HF patients receiving carvedilol (Treated) compared with non-HF (Healthy) individuals.**

Dot plots show fold-change of expression of miR-1, miR-133, miR-208 and miR-214 in HF patients receiving carvedilol (Treated) compared with non-HF (Healthy) individuals.

ns: no significant difference ( $P > 0.05$ ) between miRNA expressions in HF patients receiving carvedilol (Treated) compared with non-HF (Healthy) group.

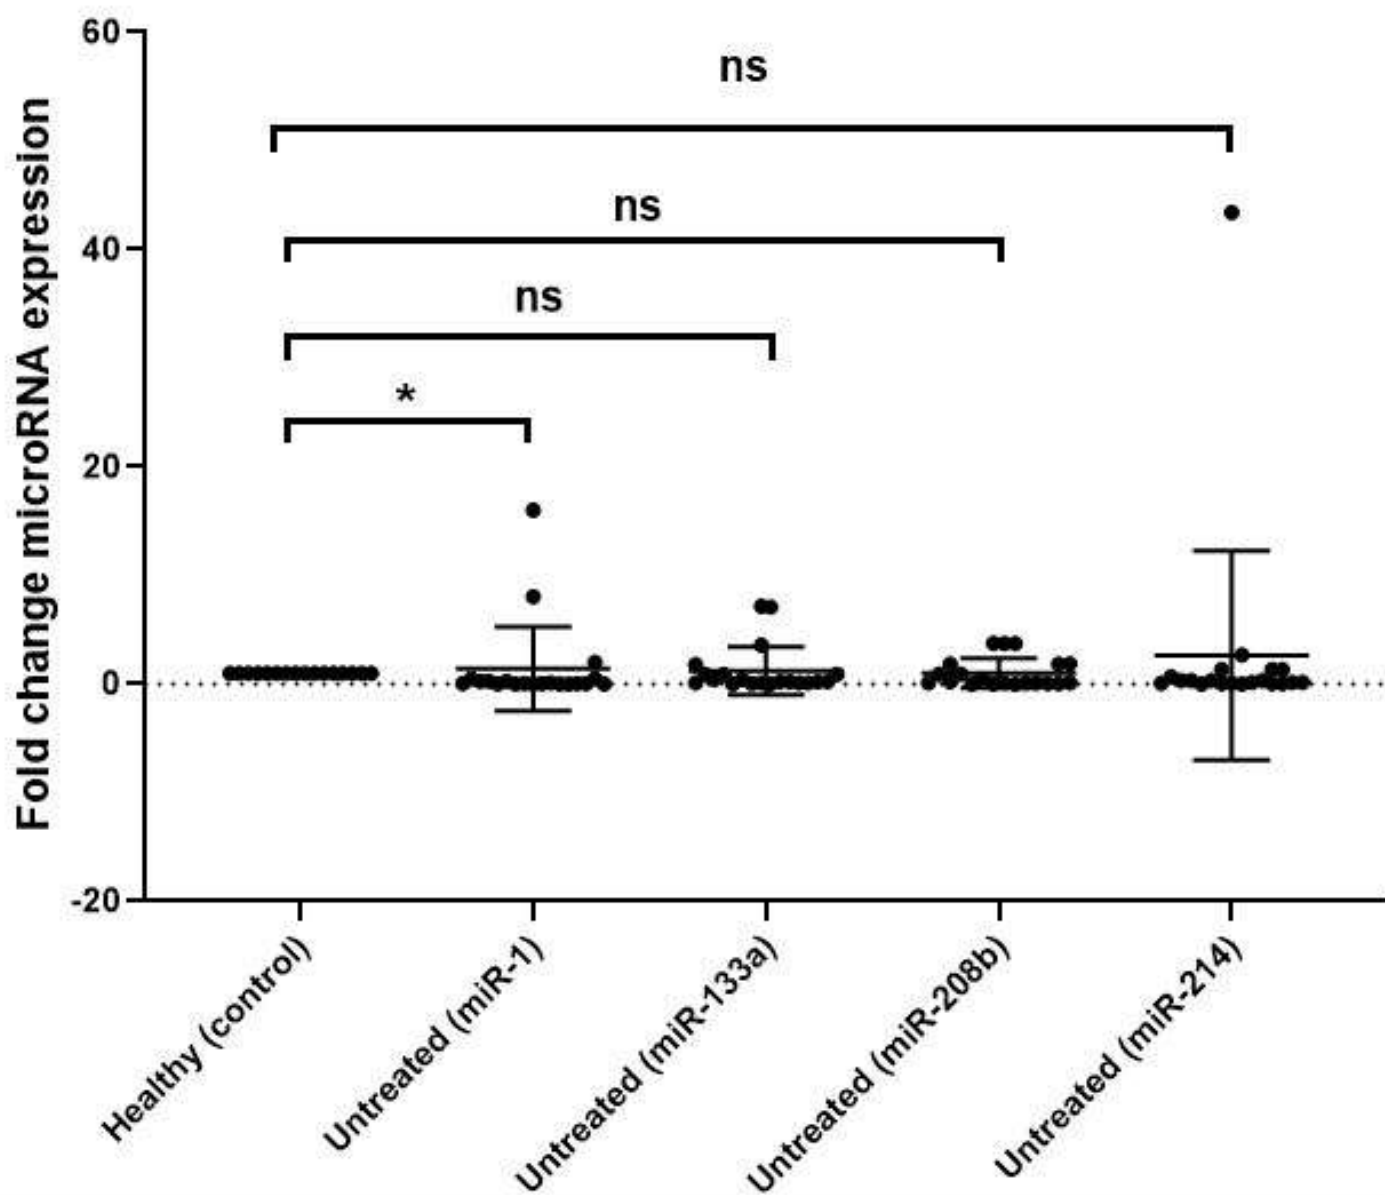

**Supplementary Figure 2. MicroRNA expression in HF patients not receiving carvedilol (Untreated) compared with non-HF (Healthy) individuals.**

Dot plots show fold-change of expression of miR-1, miR-133, miR-208 and miR-214 in HF patients not receiving carvedilol (Untreated) compared with non-HF (Healthy) individuals.

\*: significant difference ( $P < 0.05$ ) and ns: no significant difference ( $P > 0.05$ ) between miRNA expressions in HF patients not treated with carvedilol (Untreated) and non-HF (Healthy) group.

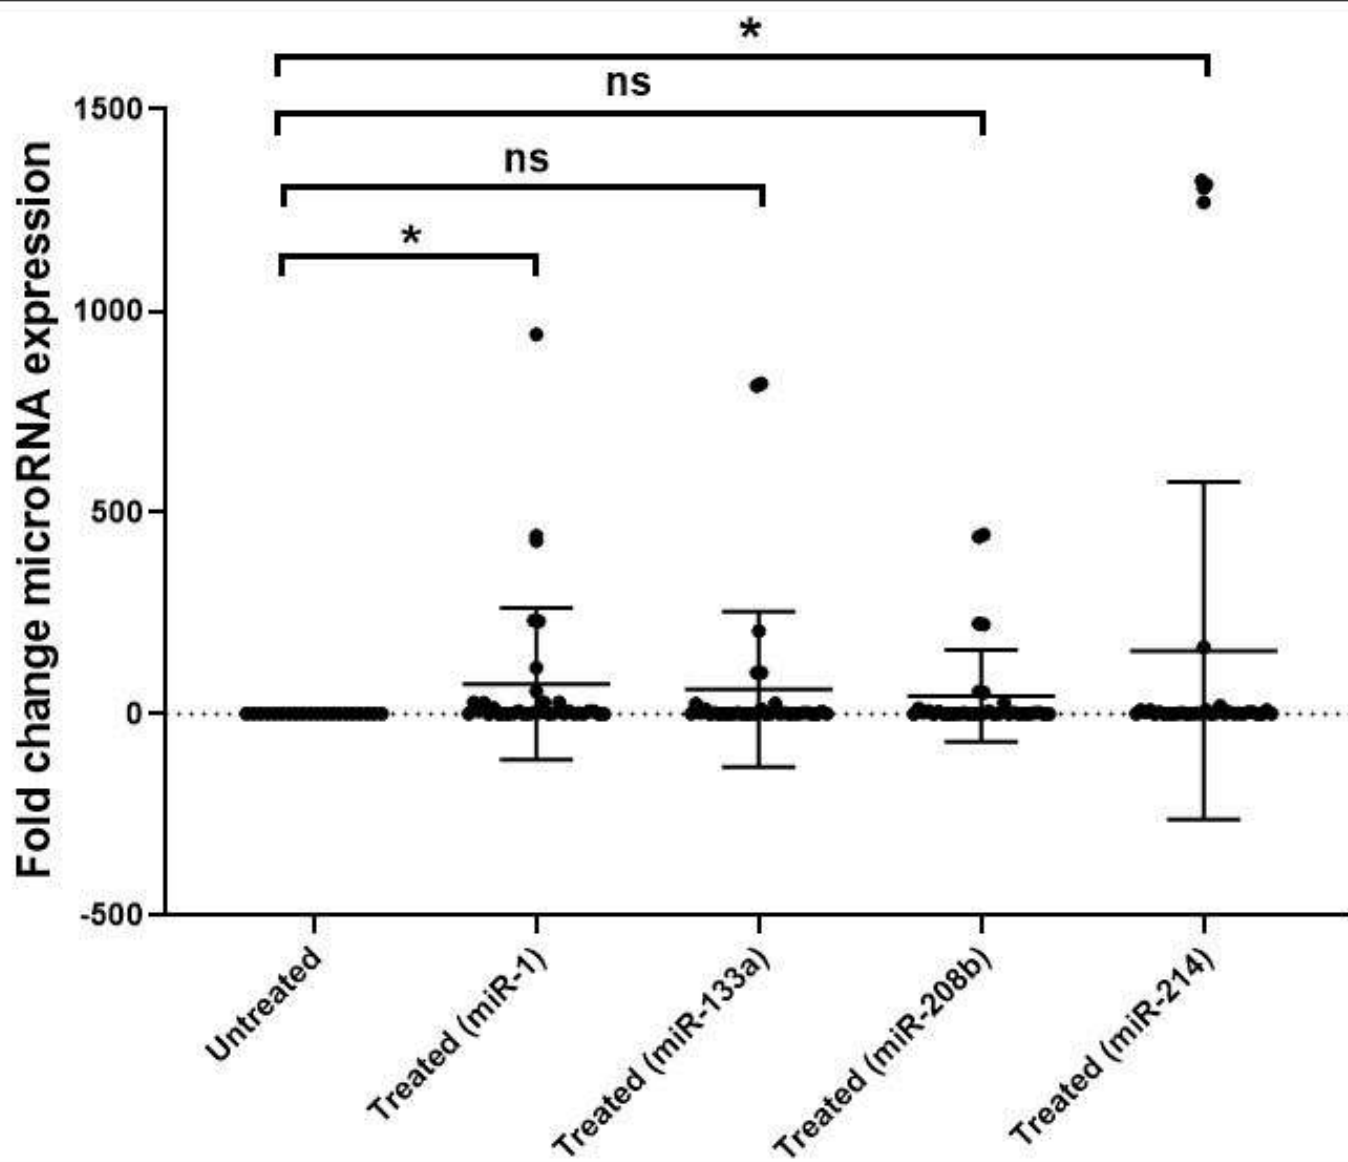

**Supplementary Figure 3. MicroRNA expression in HF patients treated with carvedilol (Treated) and HF patients not treated with carvedilol (Untreated).**

Dot plots show fold-change of expression of miR-1, miR-133, miR-208 and miR-214 in HF patients treated with carvedilol (Treated) and untreated HF group (Untreated).

\*: significant difference ( $P < 0.05$ ) and ns: no significant difference ( $P > 0.05$ ) between miRNA expressions in HF patients treated with carvedilol (Treated) and untreated HF group (Untreated).
